# Supplementary material for: Hydrazide and amidoxime dual functional membranes for uranium extraction from seawater
Source: Royal Society of Chemistry journal article supplement (doi:10.1039/d4ta00793j), 2024-01-01
Supplement: d4ta00793j1.pdf [file d4ta00793j1.pdf]

## Supplementary Information

# Hydrazide and amidoxime dual functional membranes for uranium extraction from seawater

Yunyou Yao<sup>a</sup>, Jian Liao<sup>b</sup>, Xiao Xu<sup>a</sup>, Chen Huang<sup>a</sup>, Mengtao Fu<sup>a</sup>, Kang Chen<sup>a</sup>,  
Lin Ma<sup>c</sup>, Jiaguang Han<sup>b</sup>, Lu Xu<sup>c\*</sup>, Hongjuan Ma<sup>a\*</sup>

<sup>a</sup> Shanghai Applied Radiation Institute, Shanghai University, Shanghai, 200444,  
China.

<sup>b</sup> College of Ocean Engineering and Guangxi Key Laboratory of Optoelectronic  
Information Processing, Guilin University of Electronic Technology, Beihai 536000, China

<sup>c</sup> Shanghai Institute of Applied Physics, Chinese Academy of Sciences,  
Shanghai 201800, China.

\* Corresponding author:

Lu Xu: [xulu@sinap.ac.cn](mailto:xulu@sinap.ac.cn);

Hongjuan Ma: [hongjuanma@shu.edu.cn](mailto:hongjuanma@shu.edu.cn)

# 1. Experimental section

## 1.1 Characterization methods

Fourier-transform infrared (FT-IR) spectra were collected on a Nicolet Avatar 370 FTIR spectrometer (Thermo Nicolet Company, USA) in attenuated total reflectance mode with a resolution of 4  $\text{cm}^{-1}$  and 16 scans. The elemental composition and chemical states of the membranes were analyzed by X-ray photoelectron spectroscopy (XPS) using a Thermo SCIENTIFIC ESCALAB 250Xi instrument. The XPS data were acquired through wide scans ranging from 0 to 1300 eV. In order to analysis of the hydrazide density of PE-PAO@ADH membrane. The absorbance of each mixed ADH and BCA solution were collected on an Ultraviolet visible light photometer (PerkinElmer, Lambda 265).

TGA was performed (NETZSCH, TG209, F3) in the temperature range from 25 to 800°C with a heating rate of 10 °C per minute under a nitrogen flow. Mechanical tests were conducted on a universal material testing machine (TIDJ-1000, Suzhou Zhuo Xu Precision Industry Co. Ltd., China). Nitrogen adsorption–desorption isotherms were measured by a surface aperture adsorption instrument (ASAP2010C, Micromeritics). The specific surface areas of the samples were calculated using Brunauer–Emmett–Teller (BET) method within a relative pressure (P/P0) range of 0.0–1.0, and the pore size distribution were calculated by the Barret–Joyner–Halenda (BJH) algorithm.

The surface and cross-sectional morphologies of the membrane samples and the energy dispersive spectroscopy (EDS) analysis was performed using field-emission scanning electron

21 microscopy (SEM) (JSM-6700F, JEOL, Japan). All the membranes were frozen and cracked  
22 in liquid nitrogen to investigate the original cross-section morphologies. All the membrane  
23 samples were sputtered with gold to enhance the electron conductivity before observation by  
24 SEM.

25 Contact angle experiment was used to analyze the hydrophilic and hydrophobic properties  
26 of materials by a KSV Instrument. The samples were fixed upon the specimen stage. A drop  
27 of 5  $\mu$ L distilled water was dropped onto the surface of the sample. Photographs were recorded  
28 with a NAVITAR camera to analyze the contact angle. The angle of the contact point between  
29 water droplets and the sample surface was regarded as the contact angle of the sample. Each  
30 sample was measured five times at different locations of the surface. The concentrations of U  
31 and other metals were analyzed by Inductively Coupled Plasma Mass spectrometry (ICP-MS,  
32 NexION 300D) and an Atomic Emission Spectrometer (ICP-AES, Optima 8000).

### 33 **1.2 Synthesis of PE-PAO@ADH membranes and calculation**

34 PE membranes were used as the trunk material for preparing the PE@ADH, PE-PAO and  
35 PE-PAO@ADH membranes. Before irradiation, the PE membrane was placed in a flask  
36 containing a monomer solution of AA/AN/DMF (8 vol%/32 vol%/60 vol%) and then purged  
37 with nitrogen gas for 15 min to remove the oxygen. At room temperature, the PE membrane  
38 was co-irradiated with mixed monomer solutions using electron beam (EB), the absorbed dose  
39 range of 40 to 200 kGy. Finally, the polyacrylonitrile and polyacrylic acid co-grafted PE-g-  
40 (PAN-co-PAA) membrane was extracted with DMF, washed with H<sub>2</sub>O and ethanol to remove

41 homopolymers and residual monomers and dried in an oven at 60 °C. The degree of grafting  
42 (DG) of the PE-g-(PAN-co-PAA) membrane was calculated as follows:

$$43 \quad DG(\%) = \frac{M_1 - M_0}{M_0} \times 100\% \quad (S1)$$

44 where  $M_0$  is the weight of the original PE membrane, and  $M_1$  is the weight after grafting.

45 Subsequently, a solution containing  $\text{NH}_2\text{OH}\cdot\text{HCl}$  at a concentration of 10 wt% was  
46 prepared by employing a bicomponent solvent comprising  $\text{H}_2\text{O}$  (50 vol%) and methanol (50  
47 vol%). The NaOH solution was used to adjust the pH of the solution to a neutral state. The PE-  
48 g-(PAN-co-PAA) membranes were placed in  $\text{NH}_2\text{OH}\cdot\text{HCl}$  at 70 °C for 24 hours to convert the  
49 nitrile groups into the AO groups. After obtaining the PE-PAO membrane, it was washed with  
50 deionized water to remove  $\text{NH}_2\text{OH}$  that had not been reacted, and then dried in a vacuum oven  
51 at 60 °C. The density of the AO group in the PE-PAO membrane was ascertained through the  
52 utilization of the subsequent equation:

$$53 \quad AO \text{ Density} \left( \frac{mmol}{g} \right) = \frac{(M_3 - M_2) \times 1000}{33 \times M_3} \quad (S2)$$

54 where  $M_2$  and  $M_3$  represent the weights of PE-g-(PAN-co-PAA) and PE-PAO  
55 membrane, correspondingly, while 33 is the the molecular weight of the AO group subtracted  
56 by the molecular weight of the nitrile group.

57 The hydrazide-functionalized PE-PAO@ADH membranes were synthesized with the  
58 formation of amide bonds between the carboxyl groups of PE-PAO and the hydrazide groups  
59 of ADH via the amide condensation reaction. Typically, PE-PAO and HATU were immersed  
60 in DMF at room temperature. Following 10 minutes of stirring, ADH and DIPEA were added

61 to the above DMF solution. The reaction solution was continuously vortexed for another two  
62 days at room temperature. The resulting PE-PAO@ADH membrane was washed with DMF  
63 and ethanol, followed by drying in a vacuum oven at 60 °C. Unlike the PE-PAO@ADH  
64 preparation process, PE-g-(PAN-co-PAA) membrane was directly subjected to the amide  
65 condensation reaction to obtain PE@ADH membrane.

66 The density of hydrazide groups on PE-PAO@ADH was quantified by UV spectrometer.  
67 A standard BCA reagent was obtained by mixing liquid A and liquid B in a ratio of 50:1 (v/v)  
68 according to instruction. In a typical procedure, ADH solutions were respectively added into  
69 BCA reagents. The solutions were afterward gently shaken at 37 °C for 30 min. Meanwhile,  
70 PE-PAO@ADH membrane respectively reacted with BCA reagent with constant shaking at 37  
71 °C for 30 min. The absorbance of both ADH and BCA solutions was determined to be 562 nm.  
72 According to the relationship between the absorbances of these mixed ADH and BCA solutions  
73 and the amounts of hydrazide groups on ADH, a linear calibration curve was obtained. Then  
74 the absorbance of each collected supernatant was also measured at 562 nm. The concentration  
75 of hydrazide groups on the PE-PAO@ADH membrane was determined by comparing it to the  
76 calibration curve.

77 
$$\text{Hydrazide Density} \left( \frac{\mu\text{mol}}{\text{g}} \right) = \frac{k \cdot A \cdot V}{118 \times m} \quad (S3)$$

78 where k is the constants obtained from the calibration curve about concentration versus  
79 absorbance, A is the absorbance, V is the volume of solution, m is the quality of membrane,  
80 and 118 is the molecular weight of ADH.

81 **1.3 Simulated seawater screening and reusability of PE-PAO and PE-PAO@ADH**  
82 **membranes**

83

84 5 L of simulated seawater was configured for batch adsorption and six adsorption-  
85 desorption cycles. First, 175 g of sea salt was dissolved in 5 L deionized water. Next, some  
86 uranium and competing ion standard solutions were added to the 5 L solution. The initial  
87 concentrations of the uranium and competing metal ions  $\text{VO}^{3-}$ ,  $\text{Fe}^{3+}$ ,  $\text{Co}^{2+}$ ,  $\text{Ni}^{2+}$ ,  $\text{Cu}^{2+}$ ,  $\text{Zn}^{2+}$ ,  
88 and  $\text{Pb}^{2+}$  in the simulated seawater system were about 100 times higher than that in natural  
89 seawater. The pH value was adjusted to  $8.0 \pm 0.1$  with 0.25 g of  $\text{Na}_2\text{CO}_3$ . Before adsorption,  
90 the membrane was conditioned by adding 0.02 g to a flask containing 50 mL of 2.5% KOH at  
91 50 °C for 0.5 h and was washed with deionized water until the pH of the excess water in the  
92 membrane was neutral. Next, approximately 0.02 g of the membrane was added to 5 L of  
93 simulated seawater. The adsorption experiment was conducted on a rotary shaker at 26 °C and  
94 120 rpm for 24 h. After the adsorption, the uranium and competing metal ions loaded onto the  
95 membrane were eluted with 0.1 M HCl solution at room temperature with a rotary shaker at  
96 100 rpm for 30 min. The concentration of the eluted uranium was analyzed by ICP-OES with  
97 an appropriate dilution. The adsorption capacity of the PE-PAO and PE-PAO@ADH  
98 membranes for metal ions could be determined using the following equation:

99 
$$Q = \frac{C \cdot V}{M} \quad (4)$$

100 where Q (mg/g) is the adsorption capacity of the metal ions from PE-PAO and PE-  
101 PAO@ADH membranes, C (mg/L) is the metal ion concentration measured by ICP-AES, V

102 (L) is the eluted solution volume, and M (g) is the weight of the dried PE-PAO and PE-  
103 PAO@ADH membrane that was used. After elution, the PE-PAO and PE-PAO@ADH  
104 membranes were immersed in 0.1 M NaOH solution at room temperature for 30 min for  
105 regeneration. Then they have rinsed with deionized water until the pH of the excess water in  
106 the PE-PAO and PE-PAO@ADH membranes was neutral. The adsorbent was used for the next  
107 adsorption–desorption cycle following the same procedure described above.

#### 108 **1.4 The calculation of adsorption model**

109 The solid-liquid ratio for adsorption experiments was 0.01 g of adsorbent in 1 L of uranyl  
110 solution. The adsorption experiment was conducted on a rotary shaker at 26 °C and 120 rpm  
111 for 24 h. To study the mechanism of uranium adsorption, the experimental kinetic data of the  
112 PE-PAO and PE-PAO@ADH membranes for uranium adsorption were simulated using the  
113 following pseudo-first-order and pseudo-second-order models.

$$114 \quad \ln(Q_e - Q_t) = \ln Q_e - k_1 t \quad (S5)$$

$$115 \quad \frac{t}{Q_t} = \frac{1}{k_2 \cdot Q_e^2} + \frac{t}{Q_e} \quad (S6)$$

116 where  $Q_t$  (mg/g) and  $Q_e$  (mg/g) are the uranium adsorption capacities at time  $t$  and  
117 equilibrium time, respectively;  $t$  is the contact time (h);  $k_1$  and  $k_2$  represent the kinetic rate  
118 constants of the pseudo-first-order (/h) and pseudo-second-order models, respectively (g/  
119 (mg.h)).

120 To further clarify the uranium adsorption mechanism of the PE-PAO@ADH membrane,  
121 the Langmuir and Freundlich equilibrium models were employed to fit the experimental data  
122 using eqs. (S7) and (S8), respectively:

123 
$$\frac{C_e}{Q_e} = \frac{C_e}{Q_m} + \frac{1}{K_L Q_m} \quad (S7)$$

124 
$$\ln Q_e = \ln K_F + \frac{1}{n} \ln C_e \quad (S8)$$

125 where  $Q_e$  is the uranium adsorption capacity at equilibrium (mg/g),  $C_e$  is the equilibrium  
 126 concentration of uranium (mg/L),  $Q_m$  is the maximum uranium-adsorption-capacity or  
 127 saturation capacity at complete monolayer coverage (mg/g),  $K_L$  is the Langmuir adsorption  
 128 constant, which represents the affinity between the adsorbates and adsorbents (L/mg), and  $K_F$   
 129 and  $n$  are the Freundlich constants characteristic of a particular adsorption isotherm (L/g).

130 **1.5 Uranium adsorption in natural seawater**

131 Natural seawater from the coastal area of Sanya, Hainan Province, China, was used for  
 132 adsorption tests. 0.01 g of PE-PAO and PE-PAO@ADH membranes was added to 25 L of  
 133 natural seawater, the container was shaken constantly at 120 rpm at room temperature, and  
 134 samples were periodically collected using a pipette for about 30 d. ICP-MS was used for  
 135 quantitative analysis. Seawater standards of CASS-6 (seawater), supplied by the National  
 136 Research Council of Canada, were used for seawater quality-control experiments. High-purity  
 137 nitric acid (2%) was used as the sample diluent and carrier phase. The uranium adsorption  
 138 capacity of the PE-PAO and PE-PAO@ADH membranes could be determined using the  
 139 following equation:

140 
$$Q = \frac{(C_0 - C_t) \cdot V}{M} \quad (S9)$$

141 where  $Q$  (mg/g) is the uranium adsorption capacity of the membranes,  $C_0$  and  $C_t$  (mg/L)  
 142 are the concentration of uranium before and after adsorption, respectively,  $V$  (L) is the seawater



143 volume, and M (mg) is the weight of the dried membranes before adsorption.

144 **2. Supplementary Figures S1-S7**

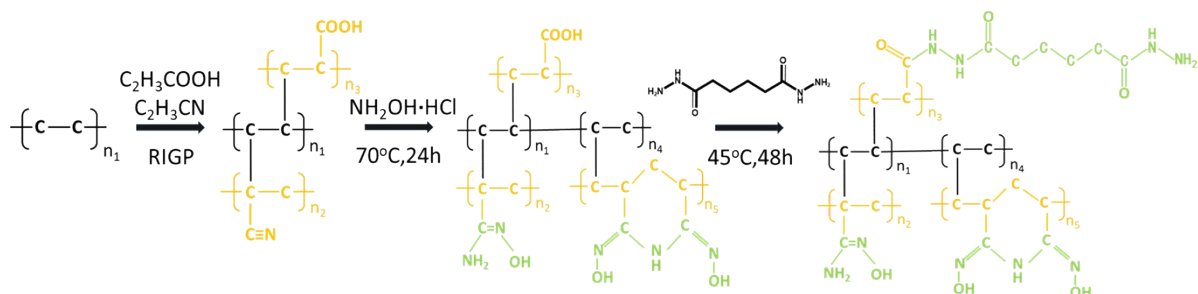

145

146 Fig. S1. Structural changes of PE, PE-g-(PAN-co-PAA), PE-PAO and PE-PAO@ADH.

147

148

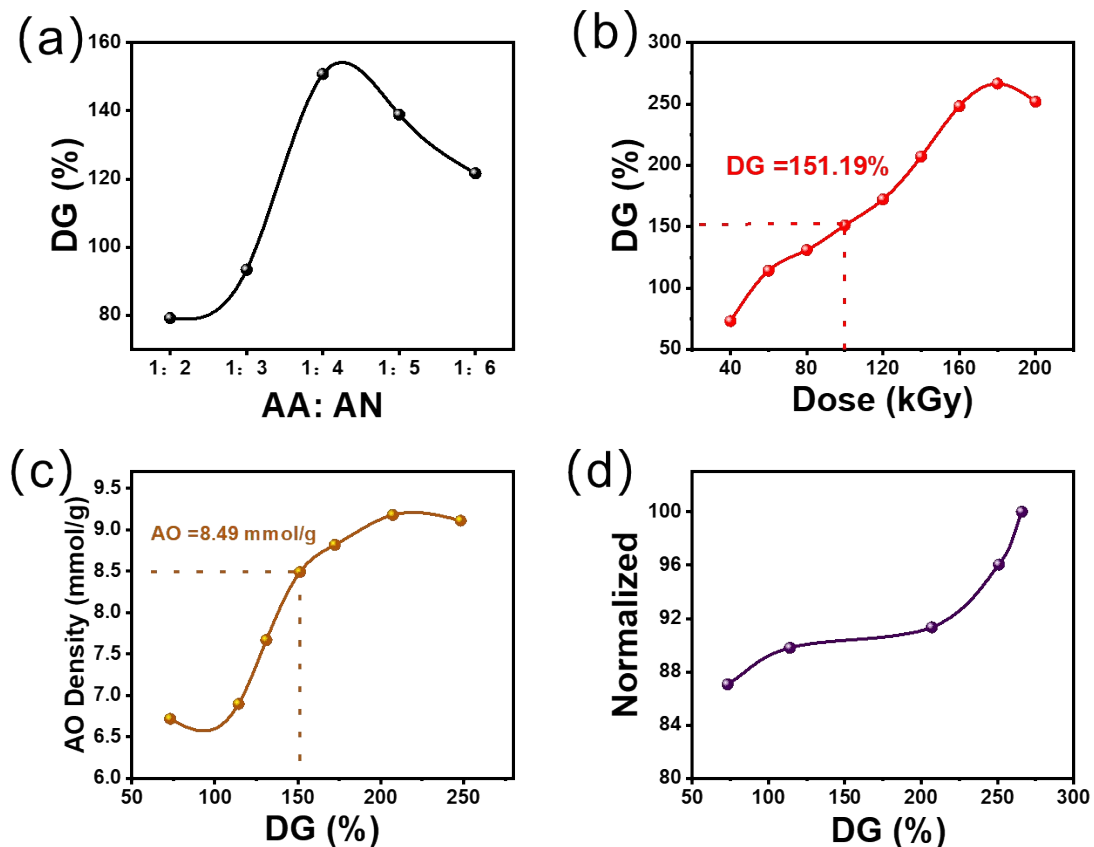

149

150 Fig. S2. DG of the PE-g-(PAN-co-PAA) membranes as a function of (a) AA: AN and (b)

151 absorbed dose. (c) AO density of the PE-PAO membranes as a function of DG. (d)

152 Normalized carbonyl FT-IR peaks intensity of the PE-g-(PAN-co-PAA) membranes as a  
153 function of DG.

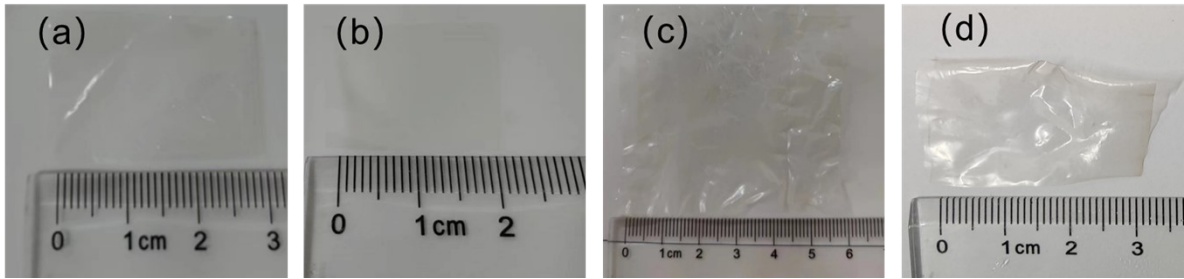

156 Fig. S3. Photo of (a) PE, (b) PE-g-(PAN-co-PAA), (c) PE-PAO and (d) PE-PAO@ADH  
157 membranes.

158  
159  
160

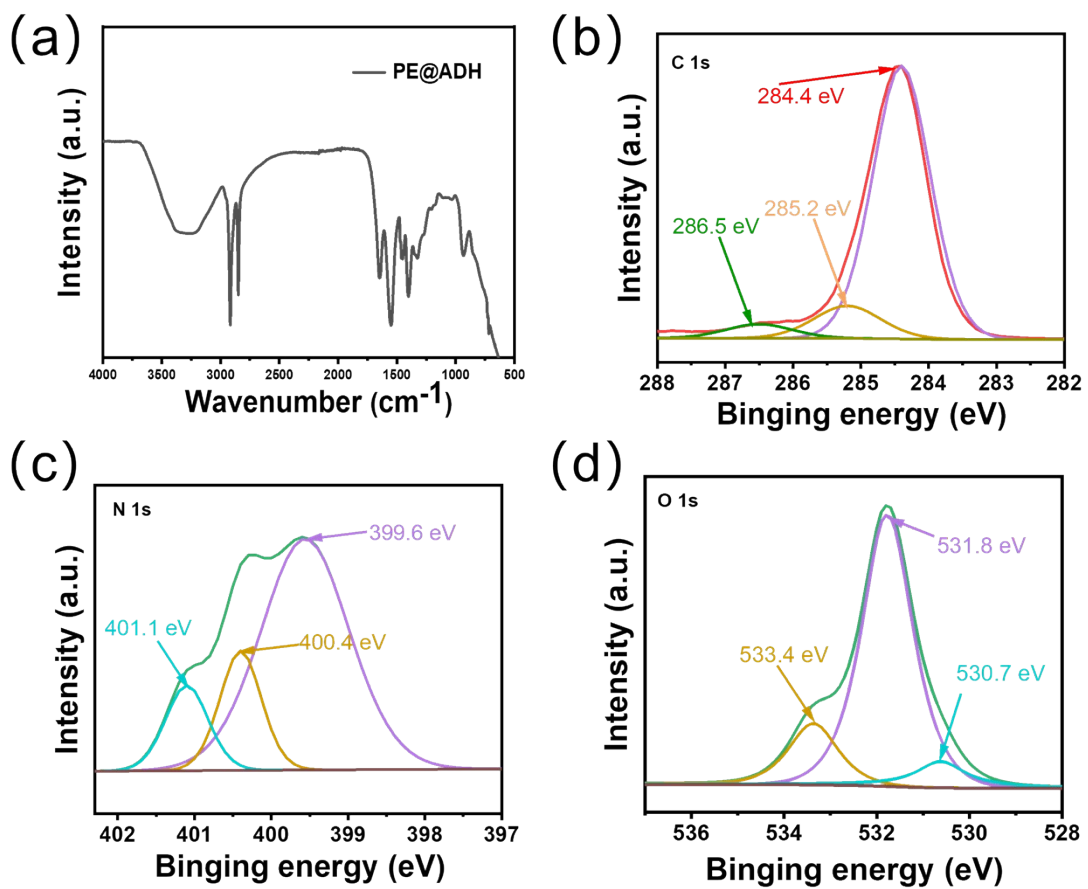

162

163 Fig. S4. Characterization of PE@ADH membranes. (a) FT-IR spectra. High-resolution XPS

164 analysis of (b) carbon, (c) nitrogen, and (d) oxygen of PE @ADH membranes.

165

166

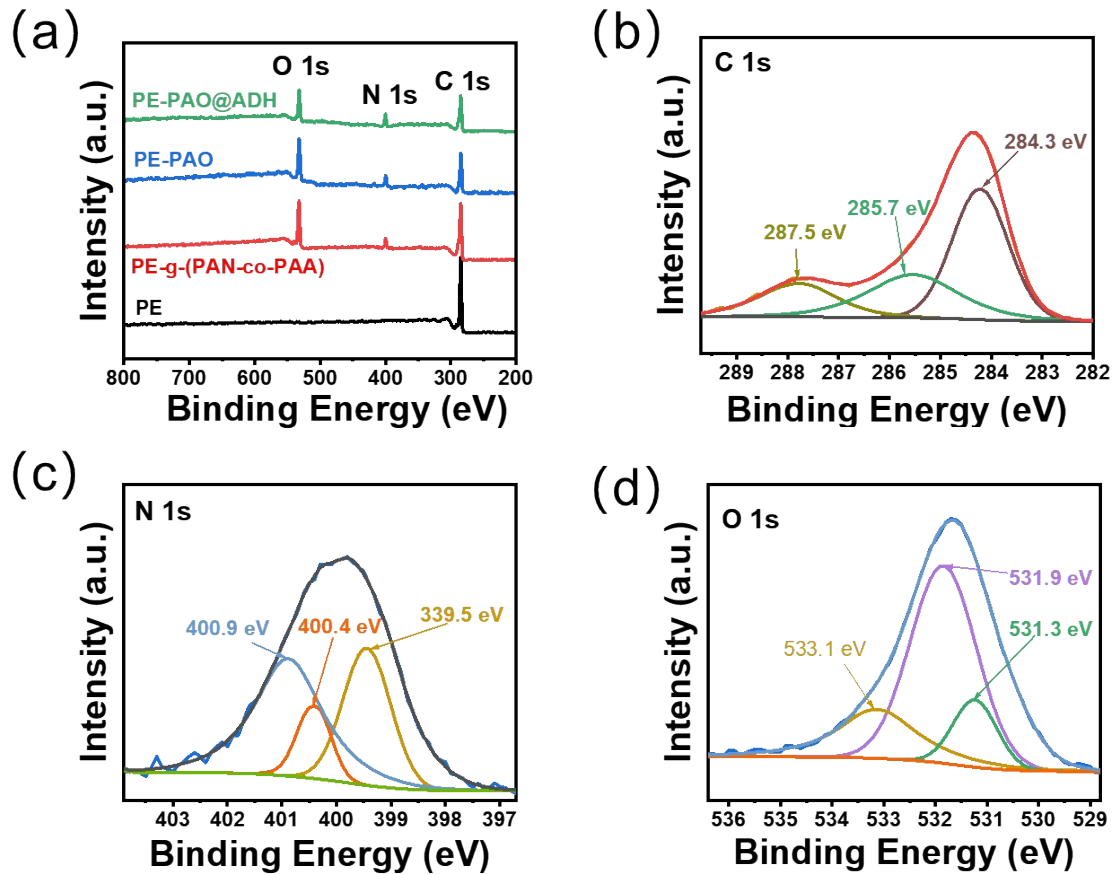

167

168 Fig. S5. (a) Survey of the XPS spectra. High-resolution XPS analysis of (b) carbon, (c)

169 nitrogen, and (d) oxygen of PE-PAO@ADH membranes.

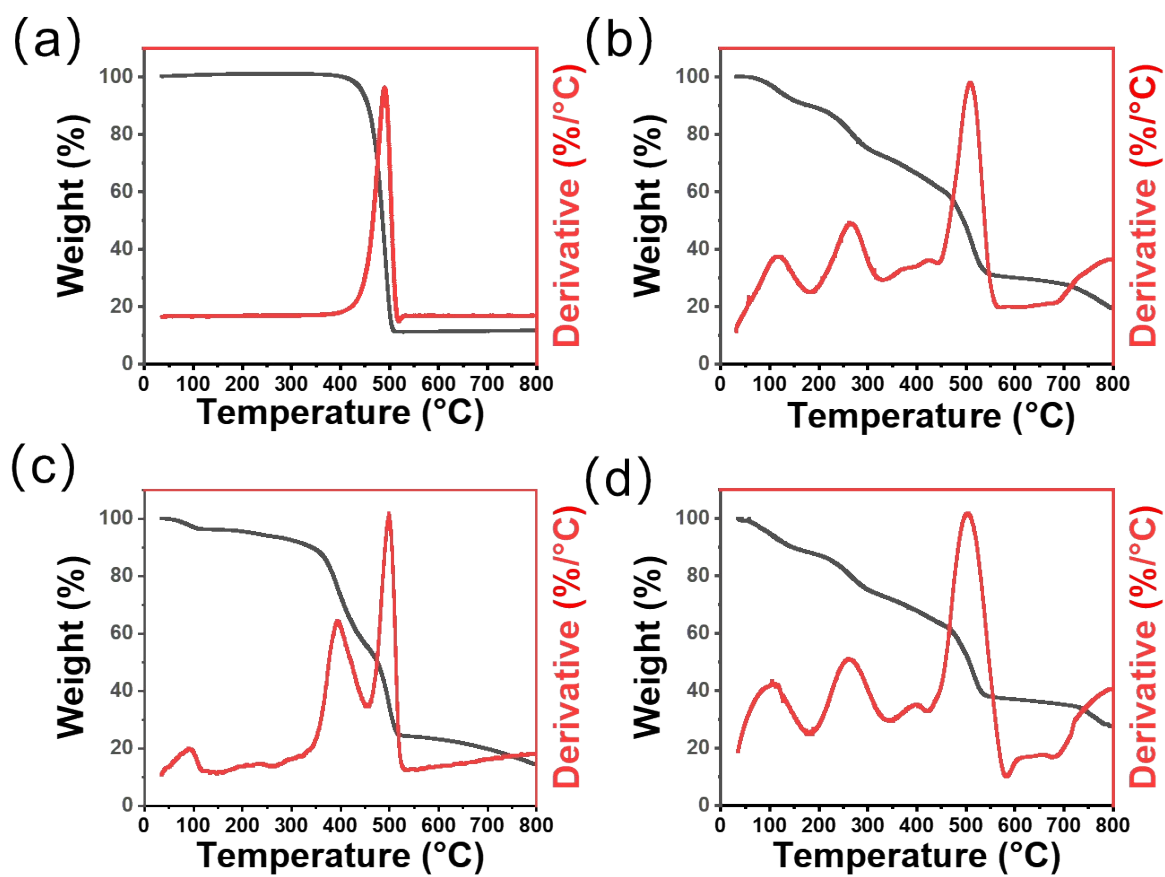

170

171 Fig. S6. TGA and DTG curves of (a) PE, (b) PE-*g*-(PAN-*co*-PAA), (c) PE-PAO, and (d) PE-

172 PAO@ADH membranes in N<sub>2</sub> atmosphere.

173

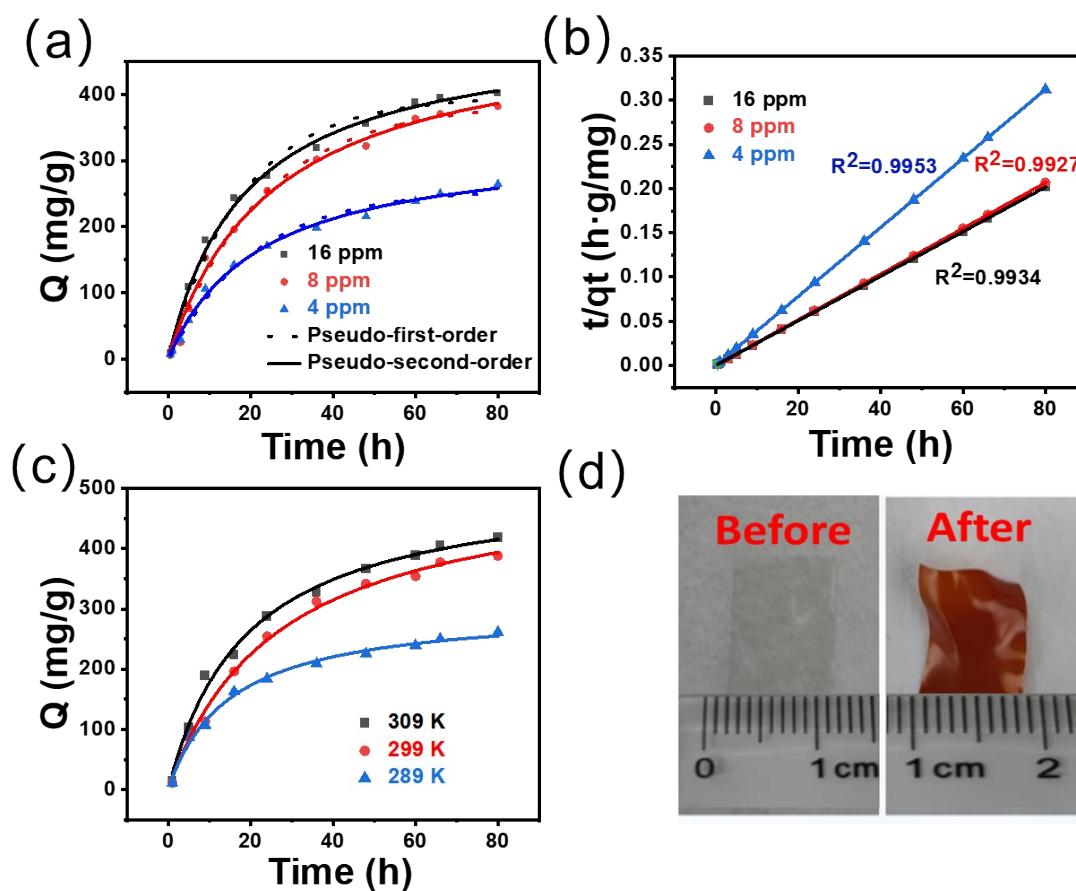

174

175 Fig. S7. Evaluation of uranium adsorption capacity of PE-PAO (a) Kinetic data, and (b)

176 pseudo-second-order models for uranium adsorption by the PE-PAO membrane at different

177 uranium concentrations (4 ppm, 8 ppm and 16 ppm). (c) Uranium adsorption by the PE-PAO

178 membrane at different temperature (289 K, 299 K and 309 K). (d) The PE-PAO membrane

179 before and after adsorption in uranium solution; significant color changes are observed owing

180 to the adsorption of uranium.

181

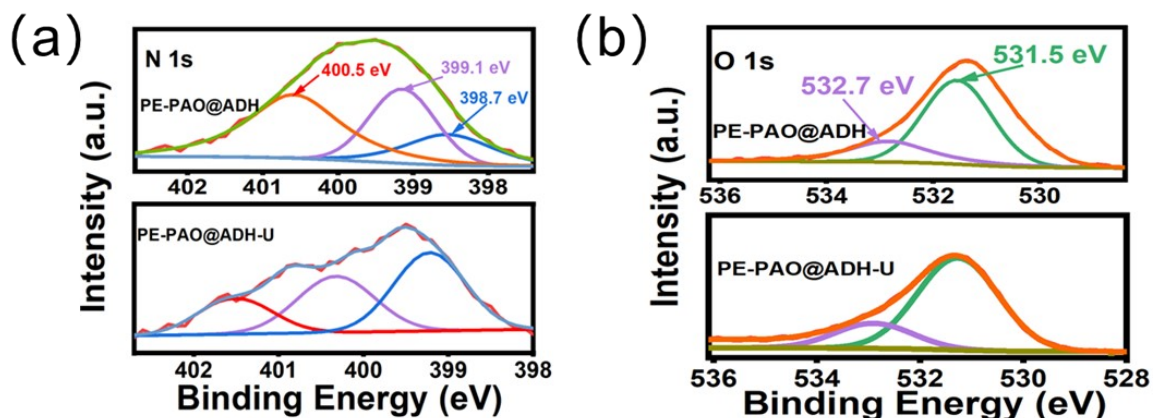

182

183 Fig. S8. Adsorption mechanism of PE-PAO and PE-PAO@ADH. (a) N 1s and (b) O 1s XPS spectra of the

184 PE-PAO@ADH before and after adsorption.

185

186

187

188

189

190

191

### 192 3. Supplementary Tables

193 Table S1. Ion concentration in simulated seawater.

| Element                                  | U   | V   | Fe  | Co  | Ni  | Cu | Zn  | Pb   | Mg                  | Ca                  |
|------------------------------------------|-----|-----|-----|-----|-----|----|-----|------|---------------------|---------------------|
| Simulated Seawater Conc. in system (ppb) | 330 | 152 | 141 | 5.3 | 101 | 65 | 408 | 34.6 | 1.2*10 <sup>5</sup> | 0.6*10 <sup>5</sup> |

194

195

196

197 Table S2. The uranium adsorption kinetic fitting parameters of PE-PAO membrane.

| Concentration | Pseudo-second-order model |                       |                                                 | Pseudo-first-order model |                       |                                                 |
|---------------|---------------------------|-----------------------|-------------------------------------------------|--------------------------|-----------------------|-------------------------------------------------|
|               | $R^2$                     | $q_e$<br>(mg-U/g-ads) | $K_2$<br>(g·mg <sup>-1</sup> ·h <sup>-1</sup> ) | $R^2$                    | $q_e$<br>(mg-U/g-ads) | $K_2$<br>(g·mg <sup>-1</sup> ·h <sup>-1</sup> ) |
| 4 ppm         | 0.995                     | 329.3                 | 0.00011                                         | 0.989                    | 256.1                 | 0.04795                                         |
| 8 ppm         | 0.993                     | 508.9                 | 0.00008                                         | 0.992                    | 386.8                 | 0.04421                                         |
| 16 ppm        | 0.993                     | 499.3                 | 0.00014                                         | 0.990                    | 396.4                 | 0.05521                                         |

198

199 Table S3. Comparison of adsorption capacities in natural seawater among adsorbent materials.

200

| Adsorbents            | Adsorption from natural seawater |         | Ref. |
|-----------------------|----------------------------------|---------|------|
|                       | mg-U/g-ads                       | time(d) |      |
| This work             | 6.76                             | 30      | /    |
| JAEA PE-g-PAO fabric  | 2.5                              | 56      | [20] |
| PE-g-poly (AO-co-IA)  | 4.2                              | 56      | [46] |
| PE-g-poly (AO-co-PA)  | 3.2                              | 56      | [47] |
| PE-g-poly (AO-co-AA)  | 3.4                              | 77      | [48] |
| PE-g-poly (AO-co-VSA) | 3.4                              | 77      | [25] |
| PE-g-poly (AO-co-MA)  | 3.1                              | 77      | [25] |
| CID NFs               | 4.8                              | 30      | [49] |
| PAO-BSPE              | 5.6                              | 33      | [8]  |
| AO-OpNpNc             | 6.3                              | 42      | [36] |

---

PIDO nanofiber

8.7

56

[50]

---

201
